# Supplementary material for: Isolation and Characterization of Lytic Phage&nbsp;TUN1 Specific for Klebsiella Pneumoniae K64 Clinical Isolates From Tunisia
Source: Research Square preprint supplement (doi:10.21203/rs.3.rs-199205/v1), 2021-03-01
Supplement: Supplementary file 1 [file f6a7706e329ea448252c2b2d.pdf]

## Supplementary material for manuscript:

# Isolation and characterization of lytic phage TUN1 specific for *Klebsiella pneumoniae* K64 clinical isolates from Tunisia

Simone Eckstein <sup>1,†</sup>, Jana Stender <sup>1,†</sup>, Sonia Mzoughi <sup>2,3,†</sup>, Kilian Vogele <sup>4</sup>, Jana Kühn <sup>1</sup>, Daniela Friese <sup>1</sup>, Christina Bugert <sup>1</sup>, Susann Handrick <sup>1</sup>, Mustapha Ferjani <sup>5</sup>, Roman Wölfel <sup>1</sup>, Andrew Millard <sup>6</sup>, Mohamed Ben Moussa <sup>2</sup>, and Joachim J Bugert <sup>1,\*</sup>

<sup>1</sup> Bundeswehr Institute of Microbiology, Munich, Germany

<sup>2</sup> Department of Virology, Military Hospital of Instruction of Tunis, Tunisia

<sup>3</sup> Faculty of Pharmacy, Monastir, Tunisia

<sup>4</sup> Department of Physics, Technical University of Munich, Garching, Germany

<sup>5</sup> Department of Anesthesiology and Reanimation, Military Hospital of Instruction of Tunis, Tunisia

<sup>6</sup> Department of Genetics and genome Biology, University of Leicester, UK

† These authors contributed equally

\* Correspondence: Joachim1Bugert@bundeswehr.org

### Content:

- **Supplementary Table S1.** Gene localizations (nucleotides), lengths (bp) and products of predicted phage TUN1 ORFs.
- **Supplementary Figure S1.** Plaque assay of *Kp* 7984 with phage TUN1 assembled in *E. coli* NEBstable cells.

**Supplementary Table S1.** Gene localizations (nucleotides), lengths (bp) and products of predicted phage TUN1 ORFs.

| ORF    | Gene product                                            | Start  | End    | Length | Direction |
|--------|---------------------------------------------------------|--------|--------|--------|-----------|
| ORF_1  | S-adenosyl-L-methionine hydrolase                       | 658    | 1,125  | 468    | forward   |
| ORF_2  | hypothetical protein                                    | 1,125  | 1,313  | 189    | forward   |
| ORF_3  | hypothetical protein                                    | 1,291  | 1,488  | 198    | forward   |
| ORF_4  | hypothetical protein                                    | 1,472  | 1,642  | 171    | forward   |
| ORF_5  | kinase                                                  | 1,674  | 2,780  | 1,107  | forward   |
| ORF_6  | RNA polymerase                                          | 2,850  | 5,570  | 2,721  | forward   |
| ORF_7  | hypothetical protein                                    | 5,670  | 5,846  | 177    | forward   |
| ORF_8  | hypothetical protein                                    | 5,850  | 6,107  | 258    | forward   |
| ORF_9  | ATP-dependent DNA ligase                                | 6,208  | 7,266  | 1,059  | forward   |
| ORF_10 | hypothetical protein                                    | 7,376  | 7,726  | 351    | forward   |
| ORF_11 | hypothetical protein                                    | 7,719  | 8,147  | 429    | forward   |
| ORF_12 | HNH Endonuclease                                        | 8,134  | 8,523  | 390    | forward   |
| ORF_13 | inhibitor of host bacterial RNA polymerase              | 8,600  | 8,764  | 165    | forward   |
| ORF_14 | ssDNA-binding protein                                   | 8,831  | 9,529  | 699    | forward   |
| ORF_15 | hypothetical protein                                    | 9,529  | 9,948  | 420    | forward   |
| ORF_16 | endonuclease I                                          | 9,929  | 10,375 | 447    | forward   |
| ORF_17 | endolysin (lysozyme/N-acetylmuramoyl-L-alanine amidase) | 10,378 | 10,833 | 456    | forward   |
| ORF_18 | hypothetical protein                                    | 10,983 | 11,099 | 117    | forward   |
| ORF_19 | hypothetical protein                                    | 11,096 | 11,215 | 120    | forward   |
| ORF_20 | HNH Endonuclease                                        | 11,212 | 11,577 | 366    | forward   |
| ORF_21 | primase/helicase protein                                | 11,552 | 13,270 | 1,719  | forward   |
| ORF_22 | hypothetical protein                                    | 13,335 | 13,544 | 210    | forward   |
| ORF_23 | hypothetical protein                                    | 13,545 | 13,727 | 183    | forward   |
| ORF_24 | hypothetical protein                                    | 13,740 | 14,051 | 312    | forward   |
| ORF_25 | hypothetical protein                                    | 14,124 | 14,525 | 402    | forward   |
| ORF_26 | DNA polymerase                                          | 14,542 | 16,659 | 2,118  | forward   |
| ORF_27 | hypothetical protein                                    | 16,674 | 16,979 | 306    | forward   |
| ORF_28 | hypothetical protein                                    | 16,983 | 17,273 | 291    | forward   |
| ORF_29 | hypothetical protein                                    | 17,270 | 17,479 | 210    | forward   |
| ORF_30 | hypothetical protein                                    | 17,476 | 17,760 | 285    | forward   |
| ORF_31 | exonuclease                                             | 17,753 | 18,658 | 906    | forward   |
| ORF_32 | hypothetical protein                                    | 18,640 | 18,750 | 111    | forward   |
| ORF_33 | hypothetical protein                                    | 18,836 | 19,081 | 246    | forward   |
| ORF_34 | hypothetical protein                                    | 19,084 | 19,305 | 222    | forward   |
| ORF_35 | tail assembly protein                                   | 19,307 | 19,567 | 261    | forward   |
| ORF_36 | head-tail connector protein                             | 19,591 | 21,198 | 1,608  | forward   |
| ORF_37 | capsid assembly protein                                 | 21,302 | 22,255 | 954    | forward   |

|        |                                |        |        |       |         |
|--------|--------------------------------|--------|--------|-------|---------|
| ORF_38 | major capsid protein           | 22,410 | 23,441 | 1,032 | forward |
| ORF_39 | predicted minor capsid protein | 23,498 | 23,719 | 222   | forward |
| ORF_40 | tail tubular protein A         | 23,788 | 24,366 | 579   | forward |
| ORF_41 | endonuclease VII               | 24,392 | 24,832 | 441   | forward |
| ORF_42 | tail tubular protein B         | 24,829 | 27,204 | 2,376 | forward |
| ORF_43 | internal virion protein A      | 27,277 | 27,687 | 411   | forward |
| ORF_44 | internal virion protein B      | 27,690 | 28,280 | 591   | forward |
| ORF_45 | internal virion protein C      | 28,280 | 30,535 | 2,256 | forward |
| ORF_46 | internal virion protein D      | 30,552 | 34,517 | 3,966 | forward |
| ORF_47 | tail fiber protein             | 34,579 | 37,632 | 3,054 | forward |
| ORF_48 | class II holin                 | 37,643 | 37,852 | 210   | forward |
| ORF_49 | terminase small subunit        | 37,886 | 38,143 | 258   | forward |
| ORF_50 | i-spanin                       | 38,240 | 38,689 | 450   | forward |
| ORF_51 | terminase large subunit        | 38,682 | 40,439 | 1,758 | forward |
| ORF_52 | hypothetical protein           | 40,449 | 40,556 | 108   | forward |
| ORF_53 | hypothetical protein           | 40,780 | 40,929 | 150   | forward |

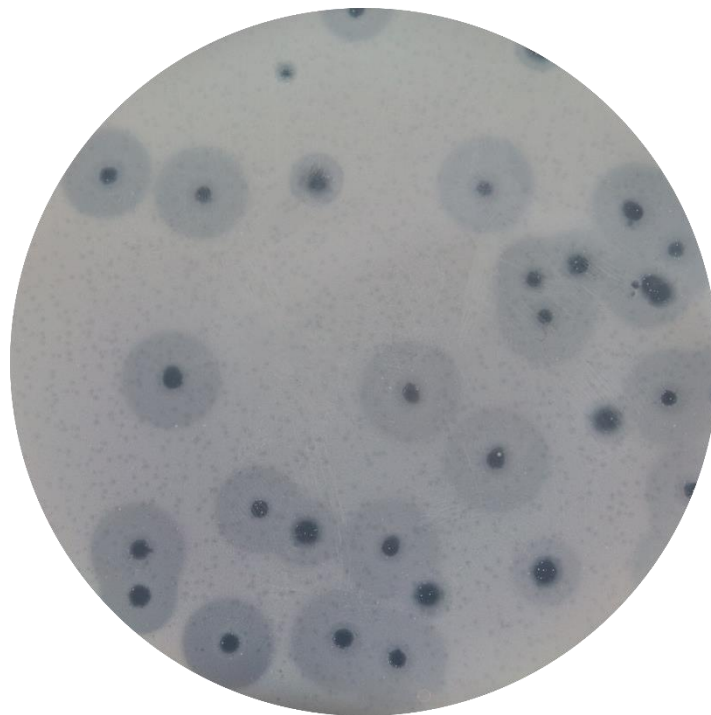

**Supplementary Figure S1. Plaque assay of *Kp* 7984 with phage TUN1 assembled in *E. coli* NEBstable cells.** After being assembled in a non-replicative host, phage TUN1 causes plaques on *Kp* 7984.
